# Supplementary material
Source: PubMed Central journal article supplement (PMC4266734)

**Supplementary Figure 1: Oligo pull down for specificity check.** Proteins from nuclear lysates of HCT116 cells (2mg total protein each) that bind to biotin labeled, double-stranded oligonucleotides, stained with staining with Coomassie blue R-250. Protein bands uniquely in rs7903146 oligo pull-down as identified by the arrow.

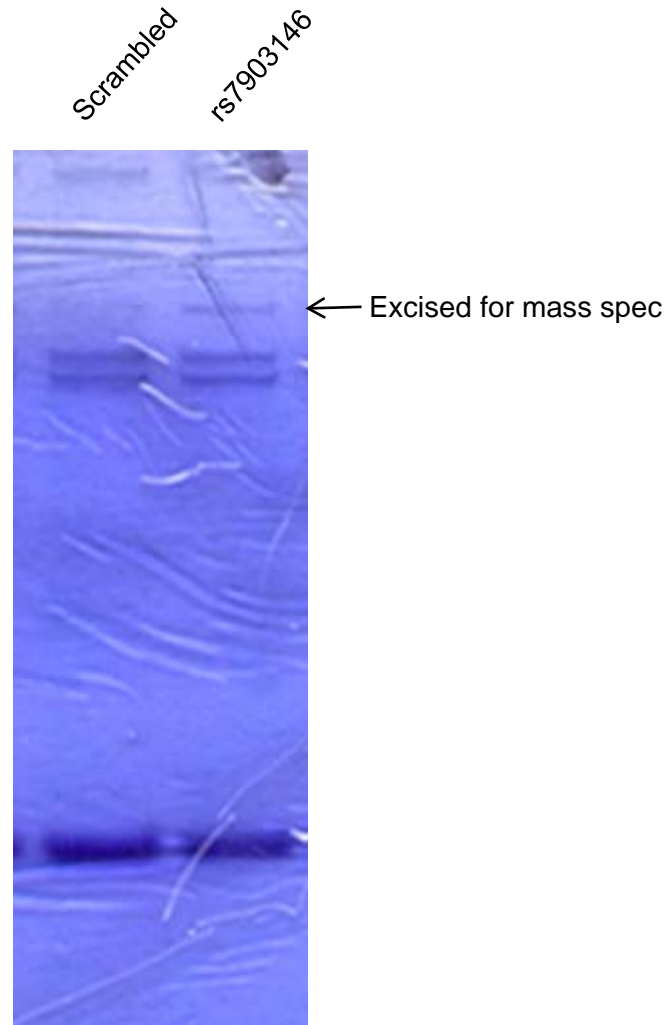

Supplement: ejhg201448x1.pdf [file ejhg201448x1.pdf]
